# Supplementary material for: The fly liquid-food electroshock assay (FLEA) suggests opposite roles for neuropeptide F in avoidance of bitterness and shock
Source: PubMed Central journal article supplement (PMC7888162; doi:10.1186/s12915-021-00969-7), 2021-02-16

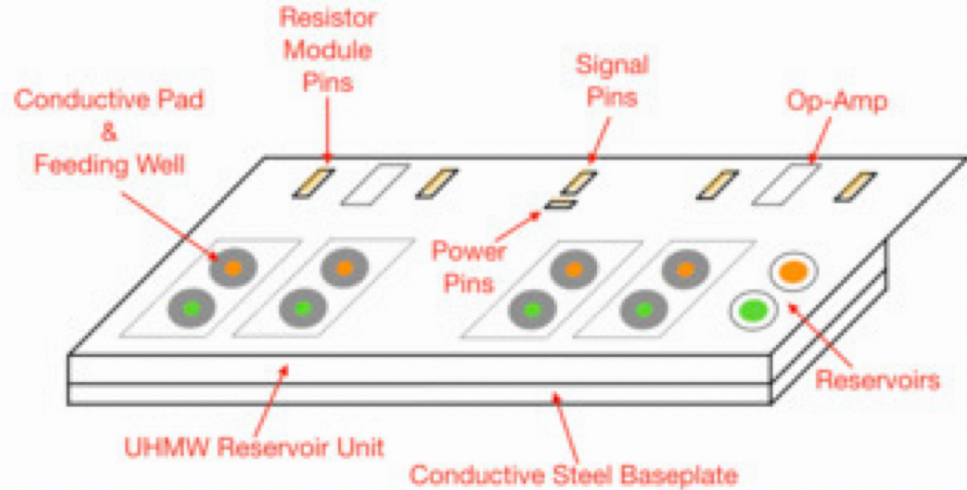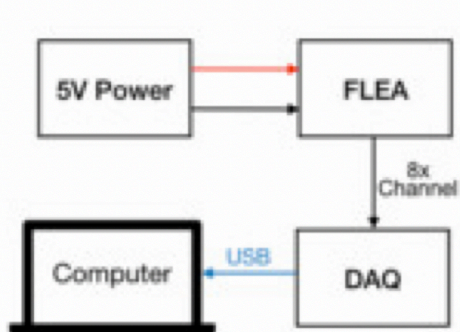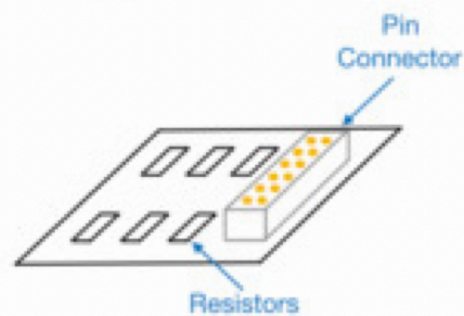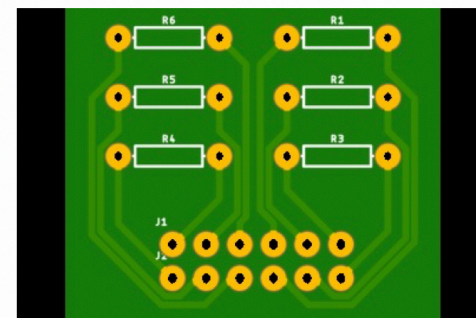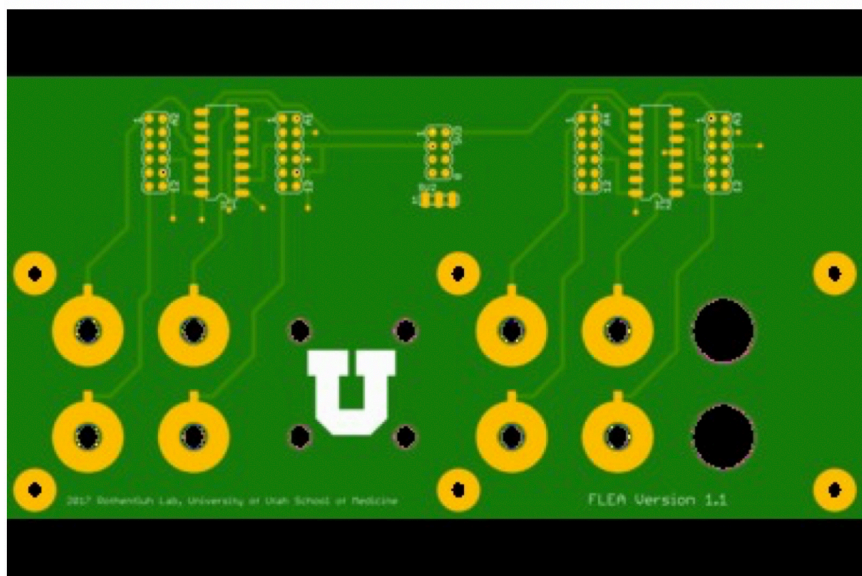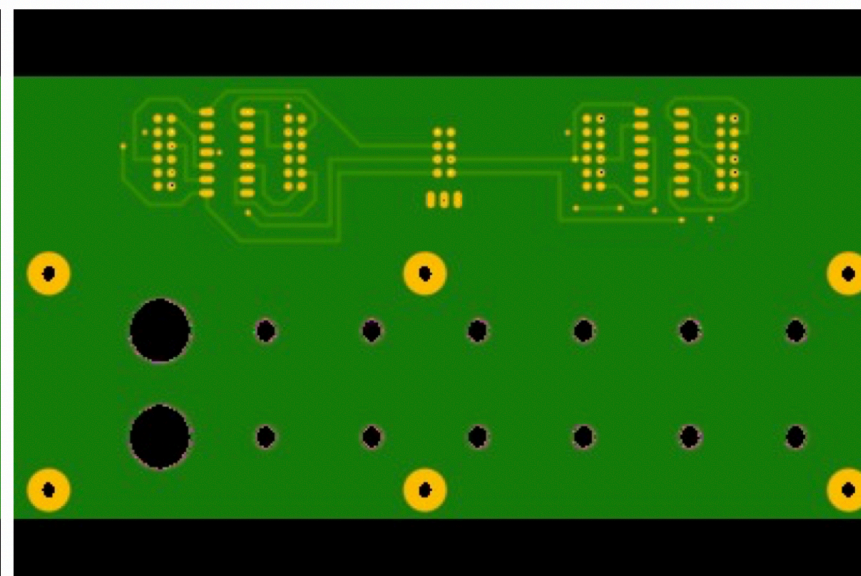

Supplement: 12915_2021_969_MOESM2_ESM.pdf [file 12915_2021_969_MOESM2_ESM.pdf]
